# Supplementary material for: Form-Stable Composite Phase Change Materials Based on Porous Copper–Graphene Heterostructures for Solar Thermal Energy Conversion and Storage
Source: MDPI journal article supplement (doi:10.3390/polym15244723), 2023-12-16
Supplement: s1 [file s1]

## **Supplementary Information**

# **Form-Stable Composite Phase Change Materials Based on Porous Copper–Graphene Heterostructures for Solar Thermal Energy Conversion and Storage**

**Chao Chang \*, Bo Li, Baocai Fu, Xu Yang and Yulong Ji**

Institute of Marine Engineering and Thermal Science, Marine Engineering  
College, Dalian Maritime University, Dalian 116026, China

\* Correspondence: [chaochang@dlnu.edu.cn](mailto:chaochang@dlnu.edu.cn)

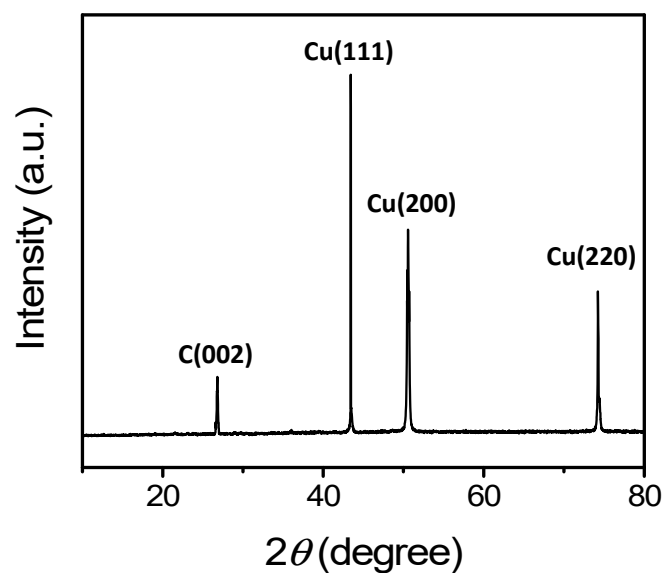

**Figure S1.** XRD patterns of the G-Cu heterostructures.

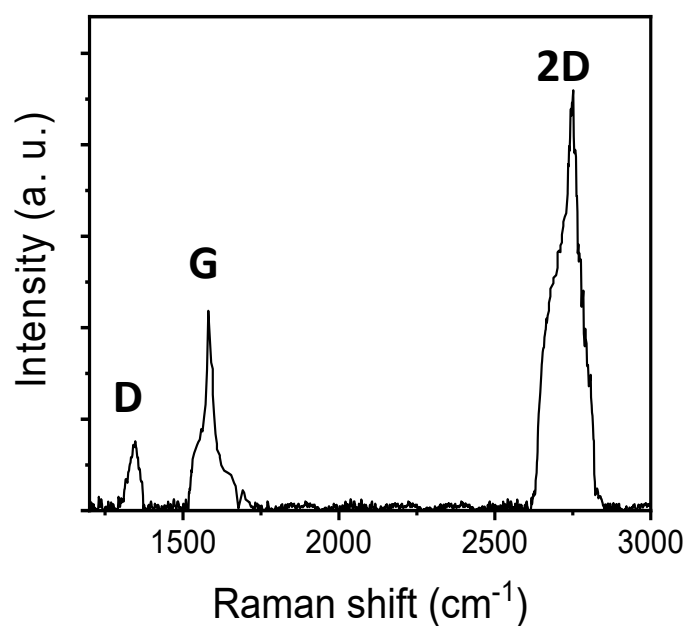

**Figure S2.** Raman spectrum from the out surface of the G-Cu heterostructures.

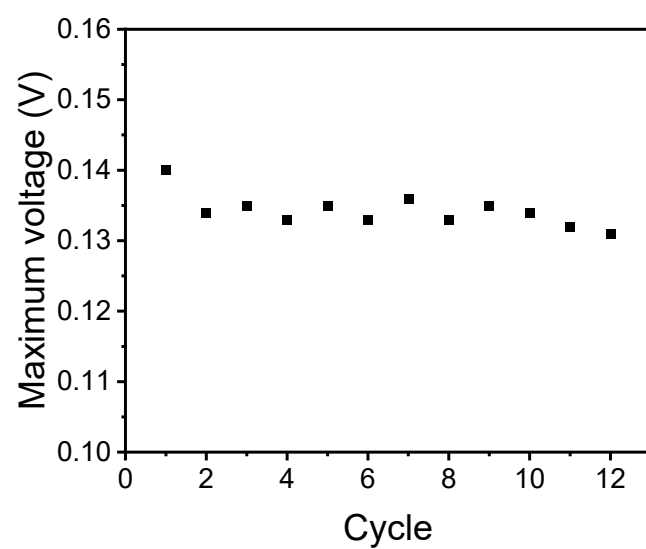

**Figure S3.** Stability tests of the solar-electric conversion device.
